# Supplementary material for: Resolving Missing Protein Problems Using Functional Class Scoring
Source: Research Square preprint supplement (doi:10.21203/rs.3.rs-1201188/v1), 2022-01-05
Supplement: Supplementary file 1 [file 9593c7687ab808c5499d6039.docx]

**Resolving missing protein problems using functional class scoring**

Bertrand Jernhan Wong1, Weijia Kong1, Limsoon Wong2, Wilson Wen Bin Goh1, 3*

1. School of Biological Sciences, Nanyang Technological University, Singapore

2. School of Computing, National University of Singapore, Singapore

3. Lee Kong Chian School of Medicine, Nanyang Technological University, Singapore

*Corresponding Author: Wilson Wen Bin Goh, wilsongoh@ntu.edu.sg

Address for correspondence/proofs:

Wilson Wen Bin Goh, PhD

School of Biological Sciences, Nanyang Technological University, 60 Nanyang Drive, Singapore, 637551

Lee Kong Chian School of Medicine, Nanyang Technological University, 60 Nanyang Drive, Singapore, 636921

Email: wilsongoh@ntu.edu.sg

# Supplementary Figures

**Supplementary Figure 1** **Abundance levels alone are not a sufficient explanation for missing proteins**. X-axis: Scaled mean expression values. Y-axis: Number of missing values across samples. The red hashed lines indicated the medians of each axis.

**Supplementary Figure 2** **Corresponding gene expressions of proteins specific to kidney and liver tissues tends to be discriminatory while proteins found in shared complexes have no such effects.**

**Supplementary Figure 3** **A:** **Recovery based on protein lists is very modest. B: Recovery based on shared FCS-predicted complexes is extremely high suggesting despite different protein lists, they point back to essentially similar complexes**
